# Supplementary material for: Development, Analysis, and Sensory Evaluation of Improved Bread Fortified with a Plant-Based Fermented Food Product
Source: MDPI journal article supplement (doi:10.3390/foods12152817), 2023-07-25
Supplement: s1 [file s1]

## Supplementary Material

Table S1. Nutritional and physicochemical profile of FFP and bread flour

|                                 | FFP   | Bread flour (Gold Medal)** |
|---------------------------------|-------|----------------------------|
| Calories (kcal/100g of product) | 467.6 | 366                        |
| Total Carbohydrates (%)         | 53.1  | 73.3                       |
| Dietary fiber (%)               | 42.6* | < 3                        |
| Proteins (%)                    | 44.5  | 10                         |
| Fats (%)                        | 2.4   | 0                          |
| Moisture Content (%)            | 12.8  | NA                         |
| pH                              | 4.4   | NA                         |
| Mean Particle Size (mm)         | 0.1   | NA                         |

Information provided by the manufacturer. Protein content was determined by a combustion method according to AACC Method 46-30 (% N×6.25); \*Dietary Fibre was determined as Total Dietary Fiber (TDF using the Megazyme enzymatic procedure (AACC approved method 441.93); moisture content was evaluated using AACC Method 44-15. \*\*This information was obtained from the manufacturer's website (<https://www.goldmedalfLOUR.com/our-flour/bread-flour/>). FFP: fermented food product; NA: not available.

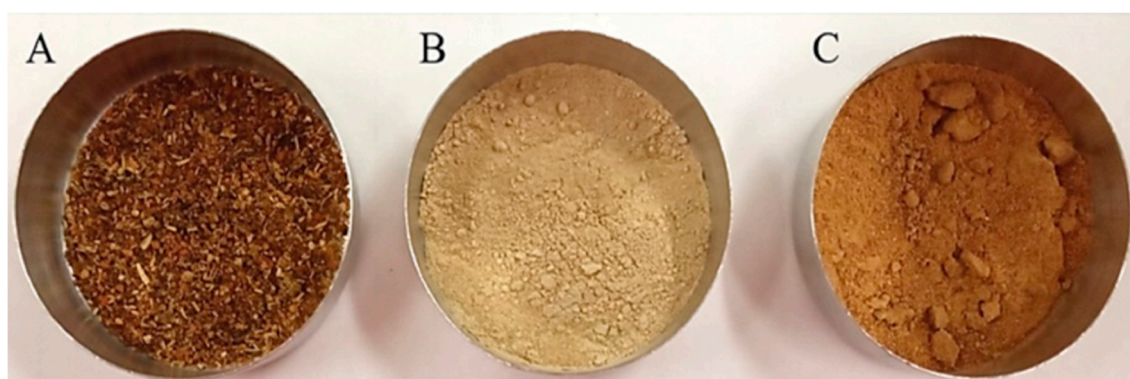

Supplementary Figure S1. Images of (A) unprocessed, (B) milled, (C) milled and autoclaved FFP. FFP: Fermented food product.

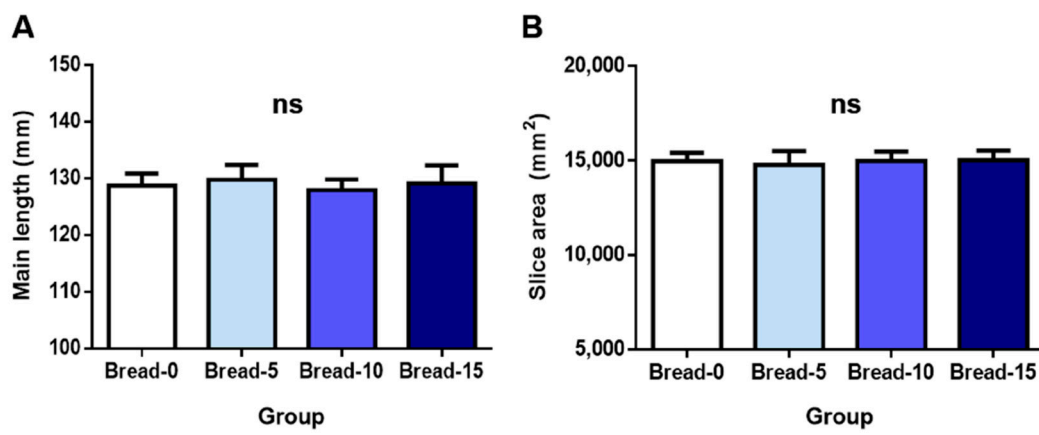

Supplementary Figure S2. Effect of FFP on bread (A) maximum height and (B) slice area.

### CONSUMERS'S PANEL

Gender: ☐ Female ☐ Male

Age:

Nationality

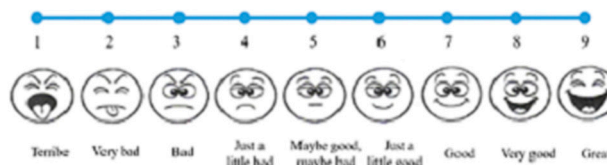

9-points Hedonic scale

#### Instructions:

You will be asked to evaluate different attributes of bread loaves and slices. You must score them according to the **9-point hedonic scale** provided (see above) by making a cross.

STEP 1. First, please go to the bread loaf expository and evaluate the 4 bread loaves using the **table 1**

STEP 2. Then you will go to one of the testing positions. There you will find 4 bread samples. Please evaluate them using the given table.

**Between samples you must eat a slice of apple and drink some water.**

**REMEMBER, DO NOT SPEAK ALOUD**

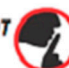

- Some clarifications:
- Shape: loaf uniformity, rising height
  - Crumb colour refers to brightness
  - Aftertaste: taste perception by the tongue when sample is removed

STEP 1. PLEASE, go to the bread loaf exhibitor and evaluate each loaf using Table 1:

Table 1

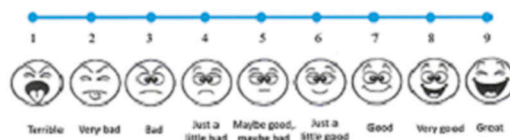

| Appearance<br>(Shape and crumb colour) |  | 1 | 2 | 3 | 4 | 5 | 6 | 7 | 8 | 9 |
|----------------------------------------|--|---|---|---|---|---|---|---|---|---|
| Loaf                                   |  |   |   |   |   |   |   |   |   |   |
|                                        |  |   |   |   |   |   |   |   |   |   |
|                                        |  |   |   |   |   |   |   |   |   |   |
|                                        |  |   |   |   |   |   |   |   |   |   |

STEP 2. Then please go to one of the testing position **Nº**  and evaluate the given samples.

Sample Nº

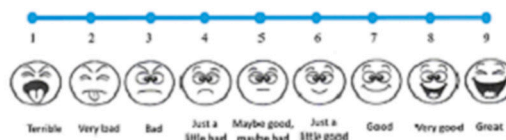

|                |                      | 1   | 2 | 3 | 4 | 5 | 6  | 7 | 8 | 9 |
|----------------|----------------------|-----|---|---|---|---|----|---|---|---|
| Appearance     | Crumb color          |     |   |   |   |   |    |   |   |   |
|                | Crust color          |     |   |   |   |   |    |   |   |   |
| Odour          |                      |     |   |   |   |   |    |   |   |   |
| Texture        | Hardness             |     |   |   |   |   |    |   |   |   |
|                | Taste                |     |   |   |   |   |    |   |   |   |
| Taste          | Aftertaste           |     |   |   |   |   |    |   |   |   |
|                | Aftertaste pleasant? | Yes |   |   |   |   | No |   |   |   |
| Overall liking |                      |     |   |   |   |   |    |   |   |   |

Supplementary Figure S3. Questionnaire facilitated to the panelists for the sensory evaluation of the bread samples.

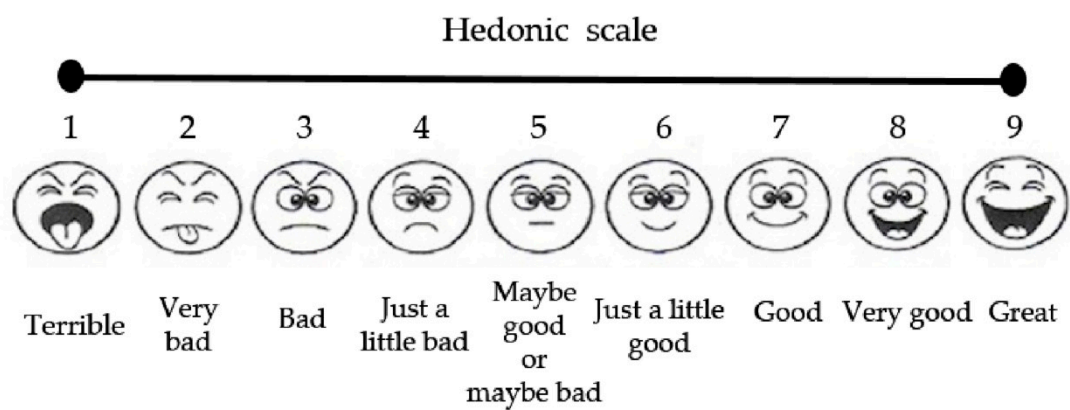

Supplementary Figure S4. Visual 9-points hedonic scale facilitated to panelists to evaluate the sensory parameters of the test samples.
